# Supplementary material for: A precision medicine approach to metabolic therapy for breast cancer in mice
Source: PubMed Central journal article supplement (PMC9122928; doi:10.1038/s42003-022-03422-9), 2022-05-20
Supplement: 42003_2022_3422_MOESM2_ESM.pdf [file 42003_2022_3422_MOESM2_ESM.pdf]

| <b>Cell Line</b> | <b>Mouse Strain</b> | <b>Cells injected</b> |
|------------------|---------------------|-----------------------|
| 4T1              | BALB/c              | 1x10 <sup>4</sup>     |
| Ac711            | C57bl/6J            | 1x10 <sup>6</sup>     |
| EMT6             | BALB/c              | 1x10 <sup>6</sup>     |
| Eph4 1424        | BALB/c              | 5x10 <sup>5</sup>     |
| M158             | C57bl/6J            | 1x10 <sup>6</sup>     |
| M6               | FVB                 | 2x10 <sup>5</sup>     |

**Supplementary Table 1.** Details of the subcutaneous tumor cell injection protocols.

| <b>Cell Line</b> | <b>Strain</b> | <b>Source</b> | <b>Mutation(s)</b> |
|------------------|---------------|---------------|--------------------|
| 4T1              | BALB/c        | ATCC          | p53, Pik3cg        |
| Ac711            | C57bl/6J      | ATCC          | HRAS               |
| EMT6             | BALB/c        | ATCC          | PTEN               |
| Eph4 1424        | BALB/c        | ATCC          | MEK1               |
| M158             | C57bl/6J      | ATCC          | MYC                |
| M6               | FVB           | ATCC          | P53                |
| MMTV-PyMT        | FVB           | Jackson Labs  | ERBB2, p53         |

**Supplementary Table 2.** Details of the models tested in this study.

**a**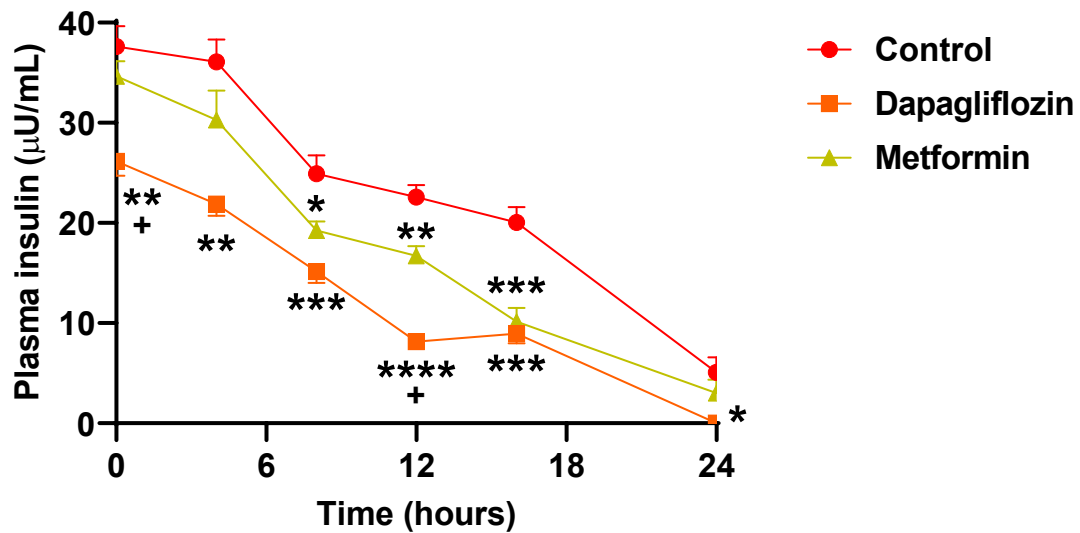**b**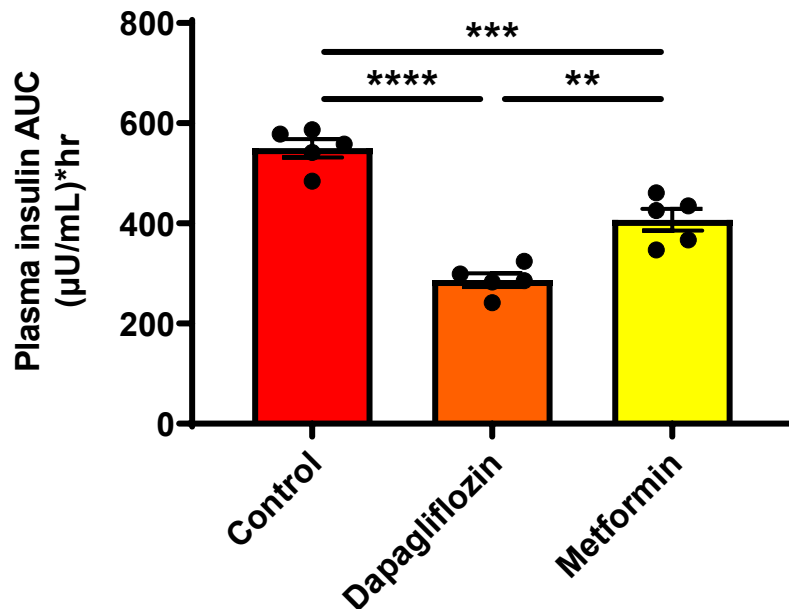

**Supplementary Figure 1. In Western diet fed mice, dapagliflozin is more effective at lowering the insulin area under the curve (AUC) than metformin.** (a) Plasma insulin concentrations. Drugs were administered and food was removed at time zero. Data are the mean $\pm$ S.E.M. of  $n=5$  per group. \* $P<0.05$ , \*\* $P<0.01$ , \*\*\* $P<0.001$ , \*\*\*\* $P<0.0001$  vs. control; + $P<0.05$  vs. metformin. Groups were compared by ANOVA with Tukey's multiple comparisons test. (b) Insulin area under the curve throughout the 24 hr period. \*\* $P<0.01$ , \*\*\* $P<0.001$ , \*\*\*\* $P<0.0001$  by ANOVA with Tukey's multiple comparisons test.

## Acute dapagliflozin treatment

**a**

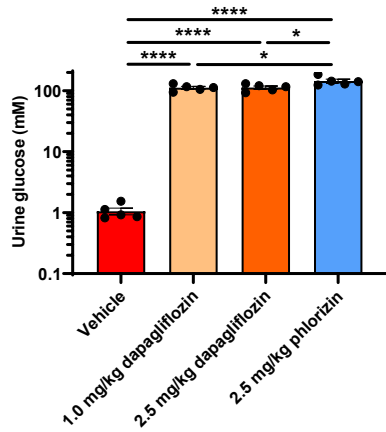

**b**

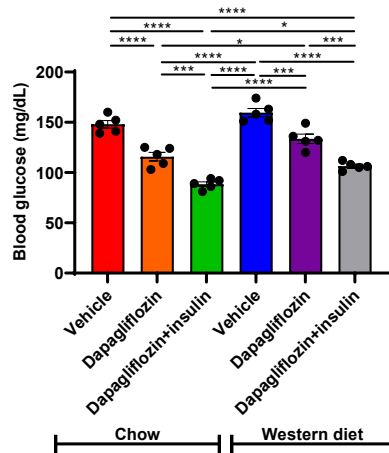

## Chronic dapagliflozin treatment

**c**

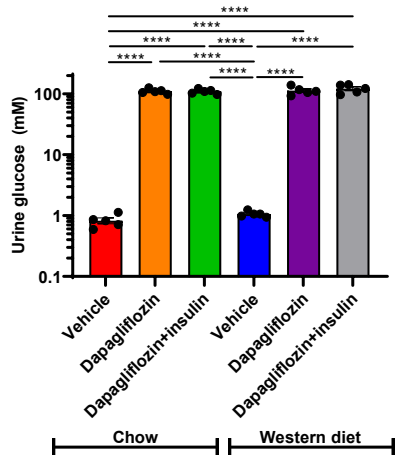

**d**

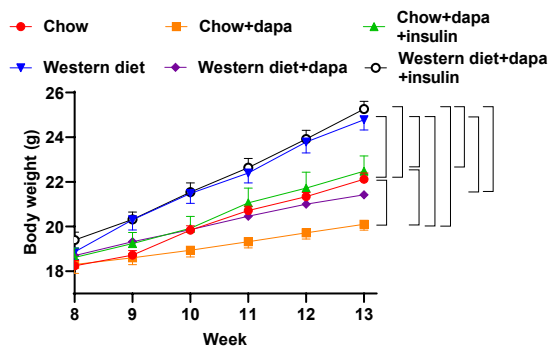

**e**

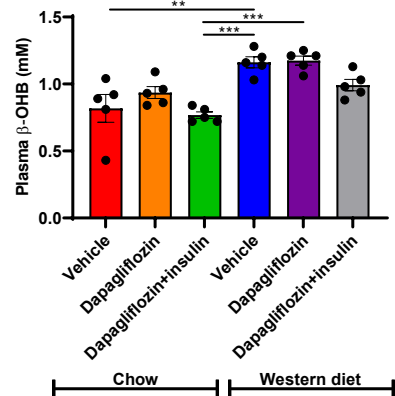

**f**

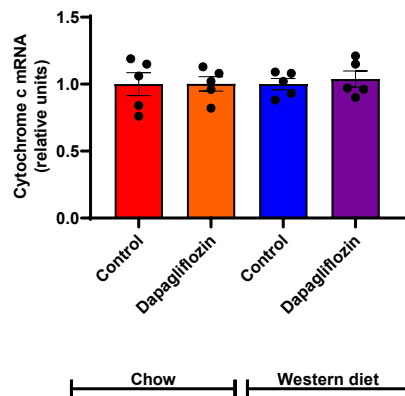

**Supplementary Figure 2. Dapagliflozin slows tumor growth in both lean and obese MMTV-PyMT mice, correlated with reductions in plasma insulin.** (a) Urine glucose in mice treated acutely with dapagliflozin or phlorizin. (b) Blood glucose in mice treated acutely with dapagliflozin±insulin. (c) Urine glucose and (d) Body weight in mice treated chronically (4 weeks) with dapagliflozin. Brackets indicate statistically significant ( $P<0.05$ ) comparisons. The mean±S.E.M. of  $n=5$  per group is shown. (e) Plasma  $\beta$ -hydroxybutyrate. (f) Tumor cytochrome c mRNA expression. In all panels,  $n=5$  per group, and \* $P<0.05$ , \*\* $P<0.01$ , \*\*\* $P<0.001$ , \*\*\*\* $P<0.0001$  by ANOVA with Tukey's multiple comparisons test.

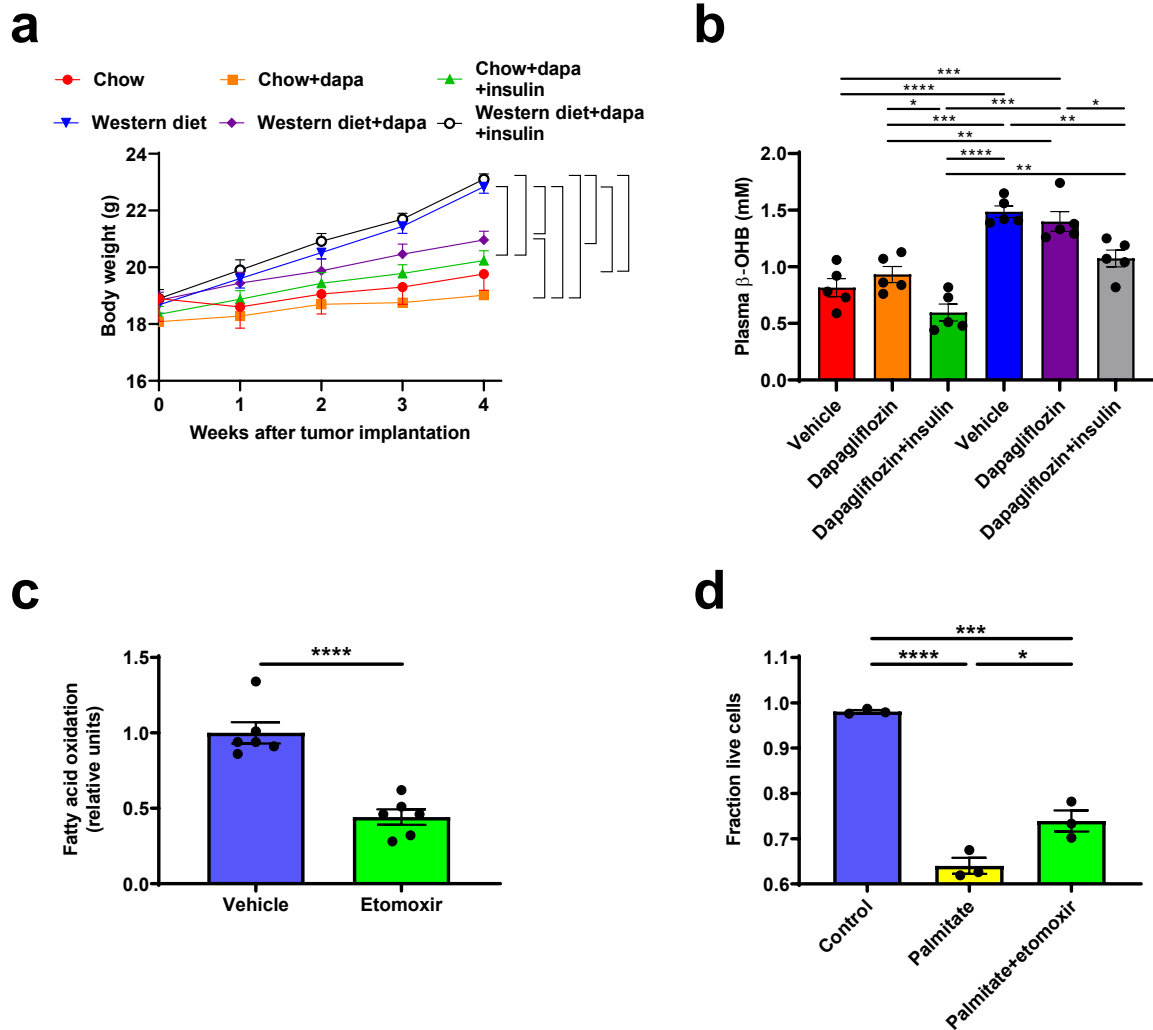

**Supplementary Figure 3. Dapagliflozin slows tumor growth in both lean and obese 4T1 tumor-bearing mice, correlated with reductions in plasma insulin.** (a) Body weight. Data are the mean $\pm$ S.E.M. of n=5 per group. Brackets denote statistically significant ( $P<0.05$ ) comparisons. (b) Plasma  $\beta$ -OHB. n=5 per group. (c) Validation of etomoxir: fatty acid oxidation with or without etomoxir. n=6 replicates per condition. \*\*\*\* $P<0.0001$  by the 2-tailed unpaired Student's t-test. (d) Fraction live 4T1 cells cultured in palmitate with or without etomoxir. n=3 replicates per condition. In panels (a), (b), and (d), \* $P<0.05$ , \*\* $P<0.01$ , \*\*\* $P<0.001$ , \*\*\*\* $P<0.0001$  by ANOVA with Tukey's multiple comparisons test.

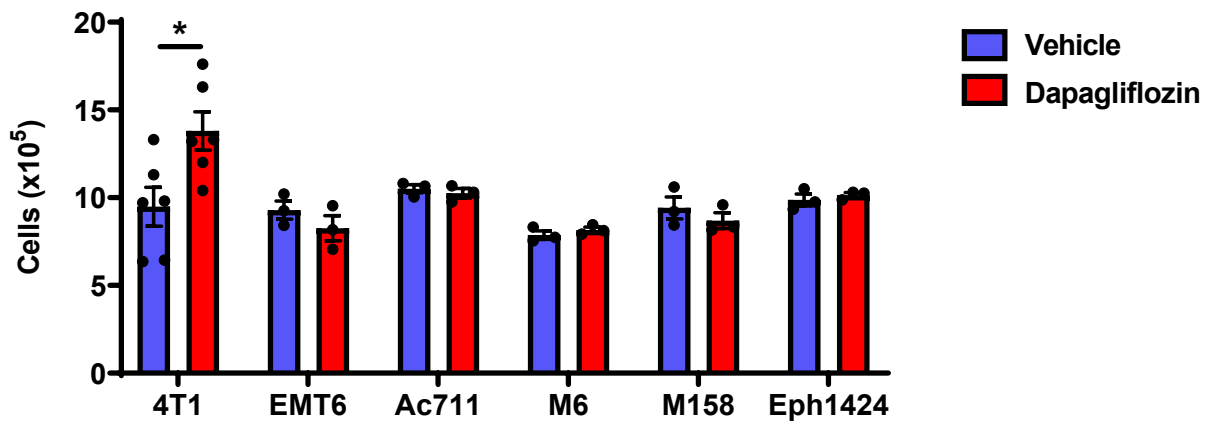

**Supplementary Figure 4. Dapagliflozin does not slow tumor growth *in vitro*.** Cells were cultured in vehicle (0.5% DMSO) or dapagliflozin (100  $\mu$ M) for 48 hr. \* $P < 0.05$  by the 2-tailed unpaired Student's t-test.  $n = 6$  (4T1) or 3 (all other cell lines) replicates per condition.
