# Supplementary material for: A precision medicine approach to metabolic therapy for breast cancer in mice
Source: PubMed Central journal article supplement (PMC9122928; doi:10.1038/s42003-022-03422-9), 2022-05-20
Supplement: 42003_2022_3422_MOESM3_ESM.pdf [file 42003_2022_3422_MOESM3_ESM.pdf]

## Description of Additional Supplementary Files

**File name:** Supplementary Data 1

**Description:** The source data behind the graphs in the paper.
